# Supplementary material for: Dynamic dual-atom synergistic catalysis boosted by liquid metal for direct seawater electroreduction
Source: Royal Society of Chemistry journal article supplement (doi:10.1039/d4ta01464b), 2024-01-01
Supplement: d4ta01464b1.pdf [file d4ta01464b1.pdf]

## Supporting information

### **Dynamic dual-atom synergetic catalysis boosted by liquid metal for direct seawater electroreduction**

*Haoxuan Li*<sup>a</sup>, *Jinghui Wang*<sup>a,\*</sup>, *Mei Cui*<sup>b</sup>, *Renliang Huang*<sup>a, c,\*</sup>, *Wei Qi*<sup>b</sup>, *Rongxin Su*<sup>a, b, c,\*</sup>

<sup>a</sup>Tianjin Key Laboratory for Marine Environmental Research and Service, School of Marine Science and Technology, Tianjin University, Tianjin 300072, P.R. China

<sup>b</sup>State Key Laboratory of Chemical Engineering, Tianjin Key Laboratory of Membrane Science and Desalination Technology, School of Chemical Engineering and Technology, Tianjin University, Tianjin 300072, P.R. China

<sup>c</sup>Zhejiang Institute of Tianjin University, Ningbo, Zhejiang 315201, P.R. China

\* Author to whom correspondence should be addressed:

wjh1031@tju.edu.cn (J.Wang), tjuhrl@tju.edu.cn (R. Huang), surx@tju.edu.cn (R. Su)

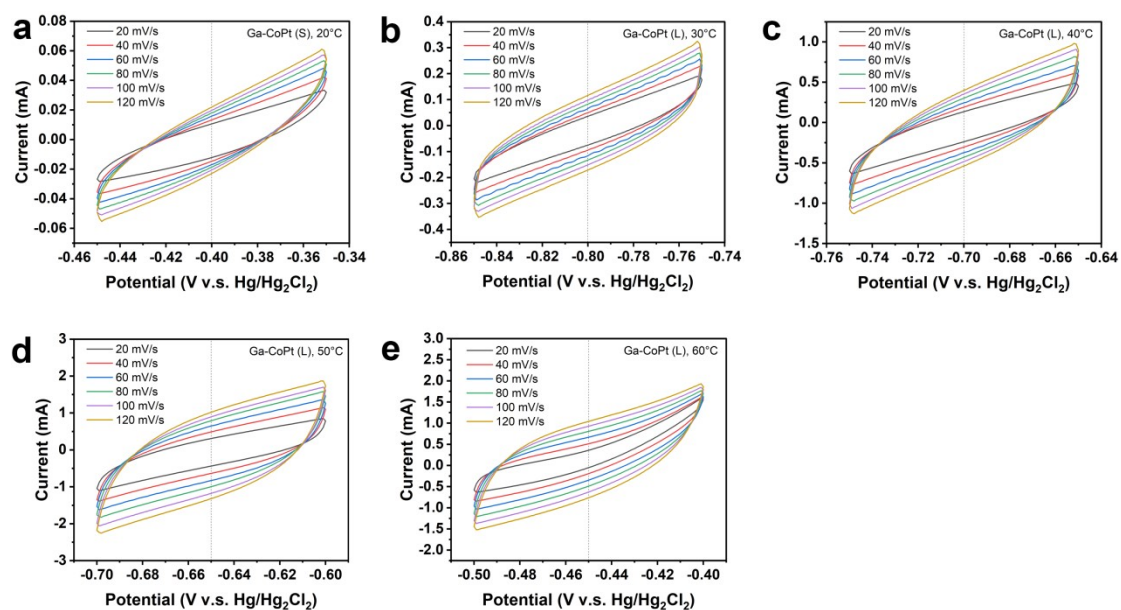

**Fig. S1. Electrochemical active surface area of Ga-CoPt determined by cyclic voltammetry (CV) measurements at a scan rate of 20, 40, 60, 80, 100 and 120 mV/s in the non-faradaic potential range. (a to e) CV curves of Ga-CoPt at (a) 20 °C (Solid), (b) 30 °C (Liquid), (c) 40 °C (Liquid), (d) 50 °C (Liquid) and (e) 60 °C (Liquid).**

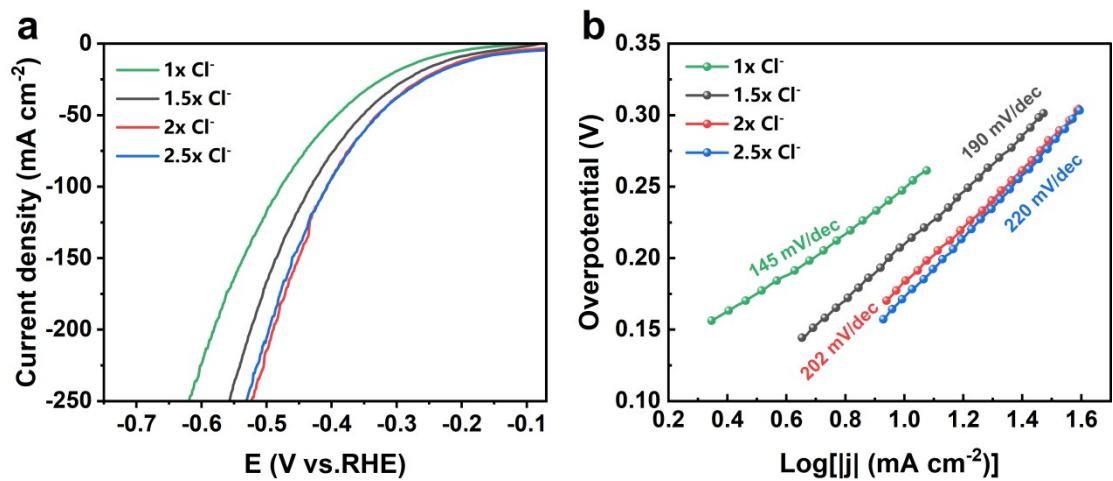

**Fig. S2.** (a) LSV curves of Ga-CoPt at 50 °C in natural seawater and 1.5 times, 2 times, 2.5 times of  $\text{Cl}^-$  concentration. (b) The corresponding Tafel plots derived from the LSV curves.

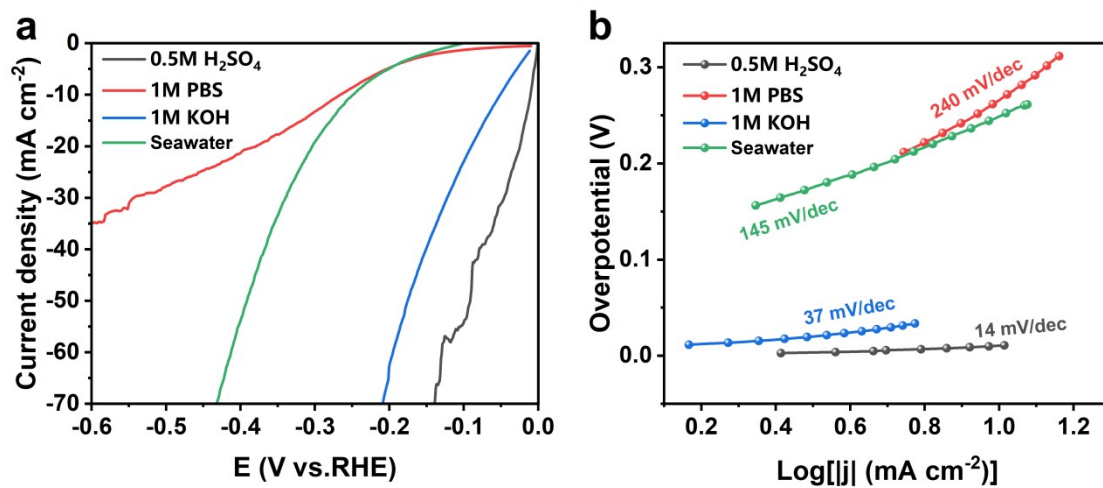

**Fig. S3.** (a) LSV curves of liquid Ga-CoPt in natural seawater, 0.5 M H<sub>2</sub>SO<sub>4</sub>, 1 M PBS and 1 M KOH electrolytes at 50 °C. (b) The corresponding Tafel plots derived from the LSV curves.

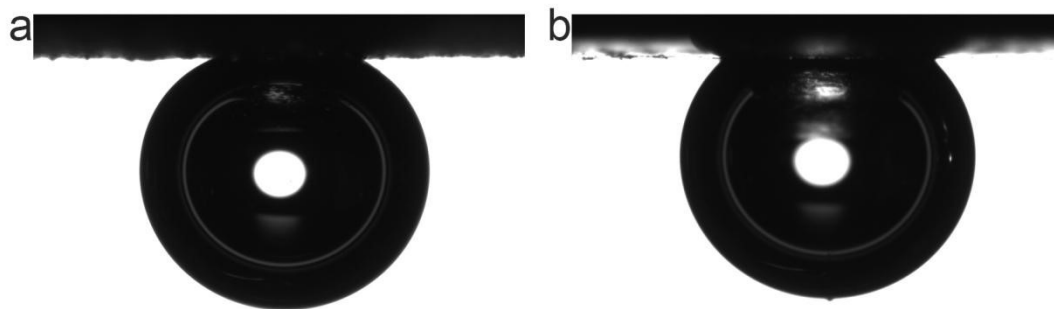

**Fig. S4.** Bubble contact angles of (a) liquid Ga-CoPt ( $164.3 \pm 2.3^\circ$ ) and (b) Pt/C ( $140.0 \pm 2.2^\circ$ ) under seawater.

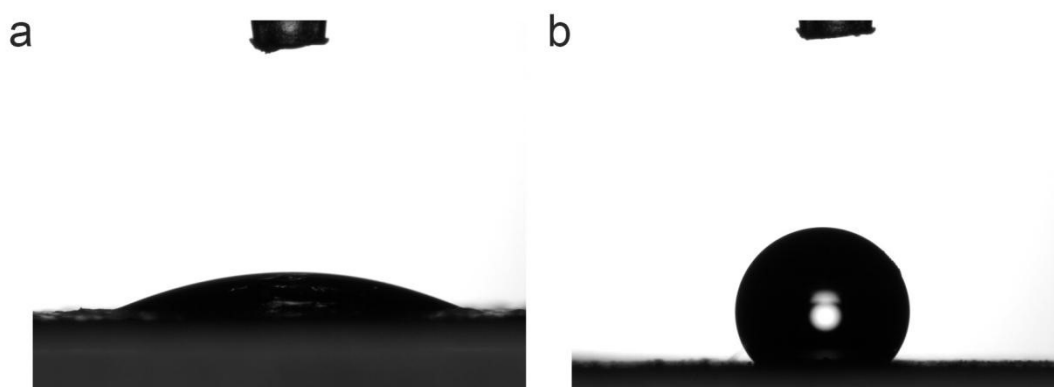

**Fig. S5.** Seawater contact angles of (a) liquid Ga-CoPt ( $23.6 \pm 1.8^\circ$ ) and (b) Pt/C ( $129.7 \pm 1.9^\circ$ ).

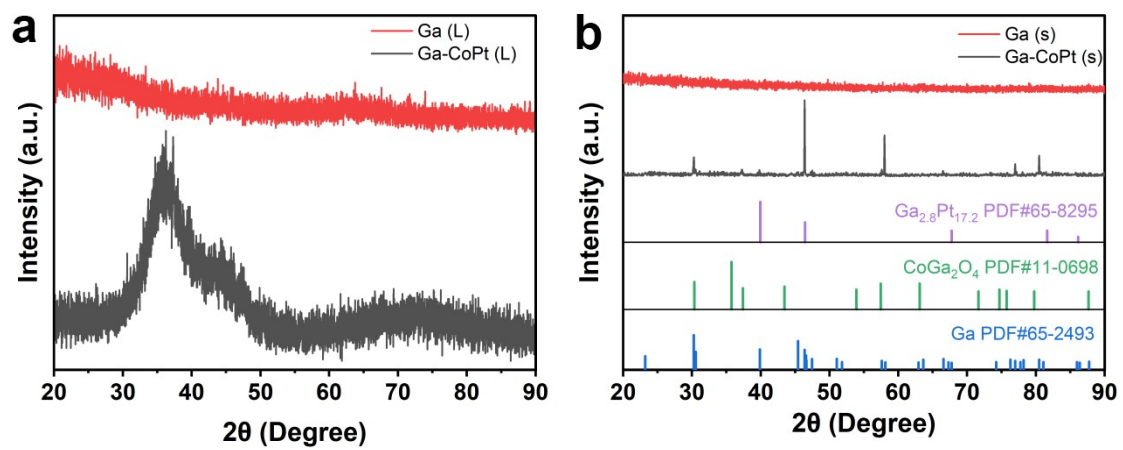

**Fig. S6.** XRD patterns of (a) liquid Ga and Ga-CoPt and (b) solid Ga and Ga-CoPt.

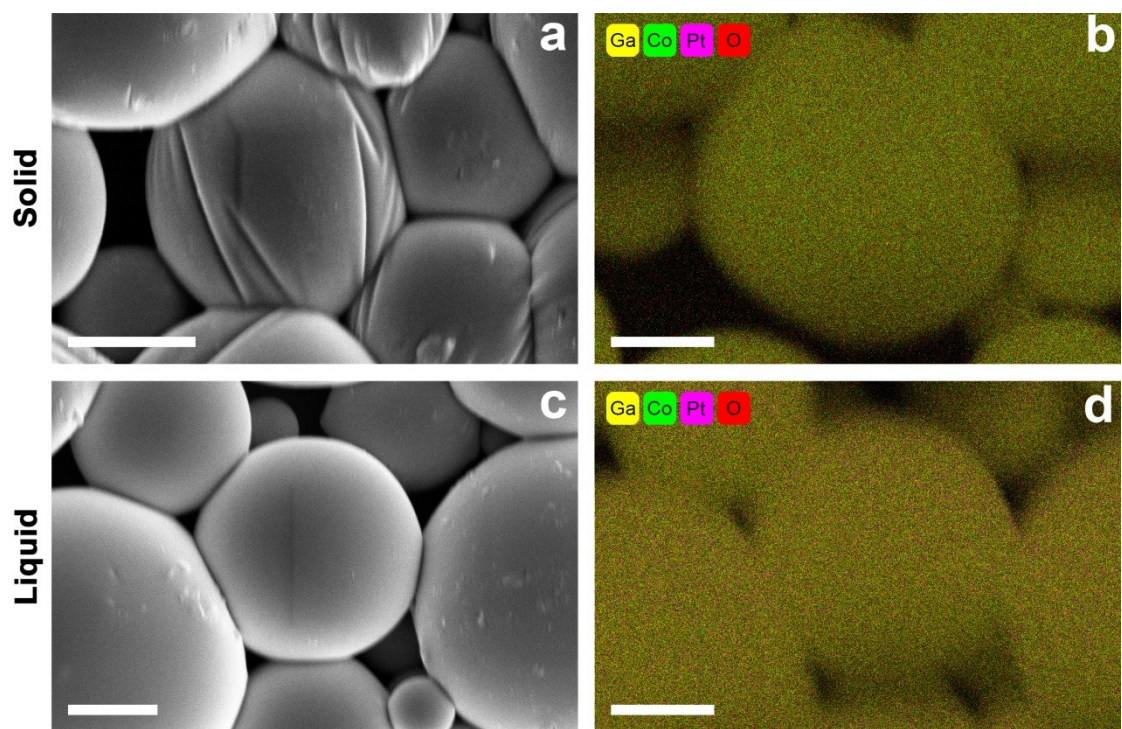

**Fig. S7. SEM images and EDS mapping of solid and liquid Ga-CoPt.** SEM images of (a) solid and (c) liquid Ga-CoPt. EDS mapping of (b) solid and (d) liquid Ga-CoPt. The scale bar in (a-d) is 1  $\mu\text{m}$ .

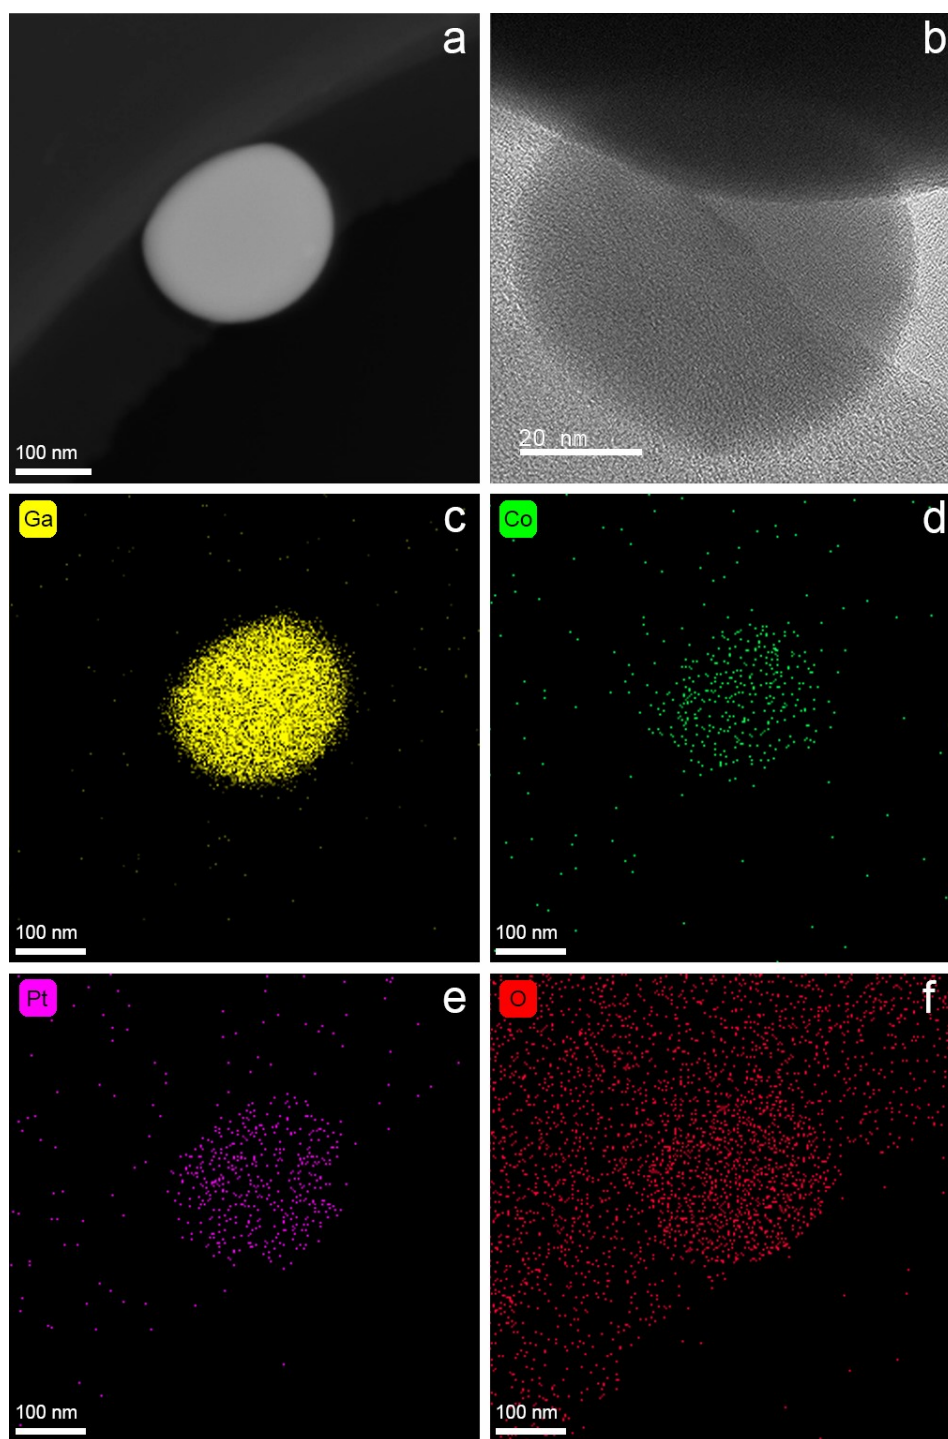

**Fig. S8. Characterizations of the liquid Ga-CoPt after the stability test. (a)** HAADF image of liquid Ga-CoPt. **(b)** HRTEM image of liquid Ga-CoPt. **(c to f)** STEM images for the spatial distribution of Ga, Co, Pt, O elements in liquid Ga-CoPt.



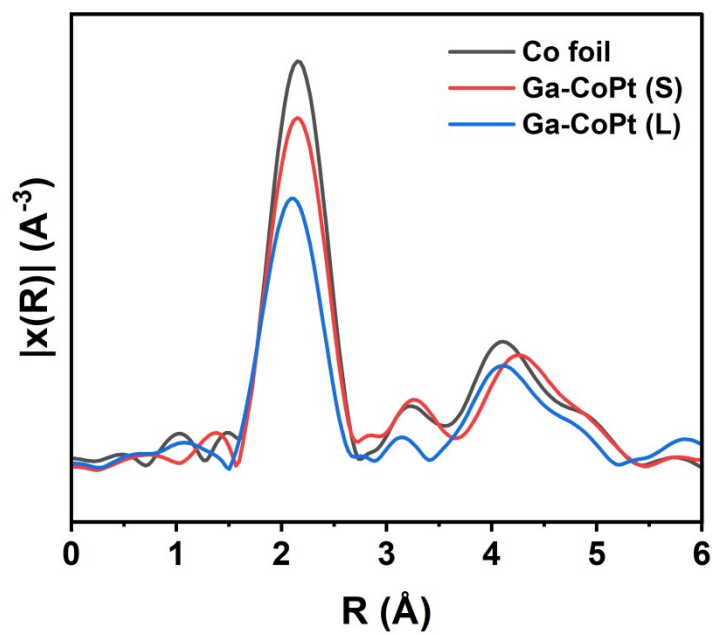

Fig. S9. R-space of Co K-edge EXAFS spectra of solid and liquid Ga-CoPt.

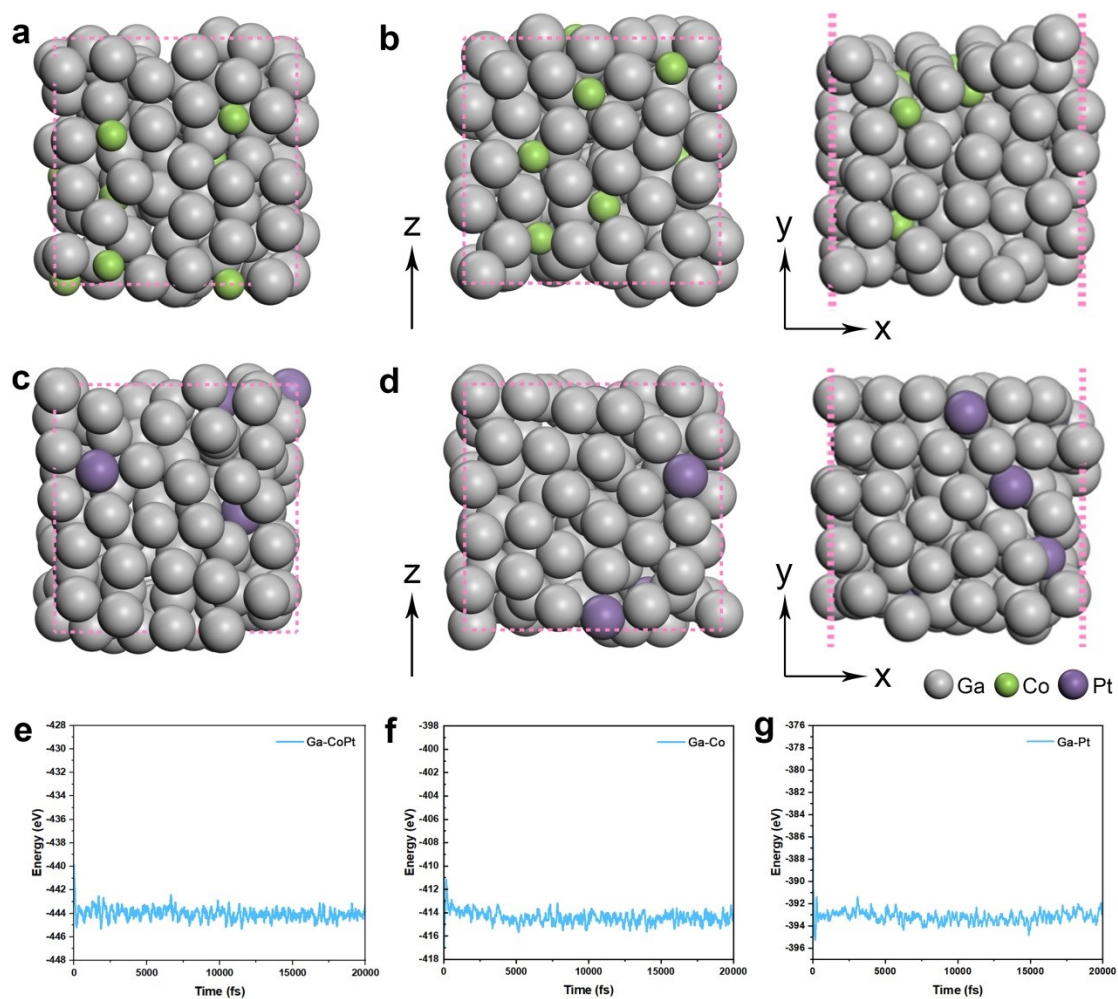

**Fig. S10.** Ab initio molecular dynamic simulation of Ga-CoPt, Ga-Co and Ga-Pt at 323.15 K. Representative snapshots of atomic configurations at (a) bulk of Ga-Co, (b) interface of Ga-Co, (c) bulk of Ga-Pt and (d) interface of Ga-Pt. Stability of (e) Ga-CoPt, (f) Ga-Co, (g) Ga-Pt models at 323.15K.

### AIMD at 293.15K(20°C)

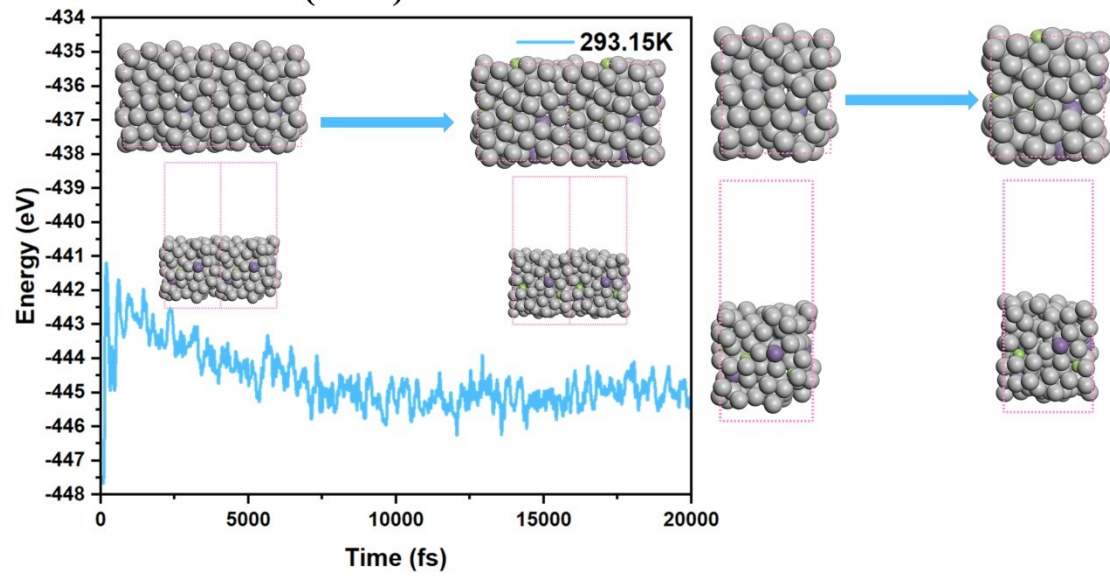

**Fig. S11.** Ab initio molecular dynamics simulation of Co and Pt atoms in solid Ga at 293.15

**K.** After 20000 fs the system is stabilized and the Co and Pt atoms are still encapsulated in Ga.

**Table S1. The comparison of electrocatalytic performance with previous reported work for direct seawater reduction.**

| <b>Catalyst</b>                                  | <b><math>\eta_{10}</math><br/>(mV)</b> | <b><math>\eta_{10}</math> of 20%<br/>Pt/C (mV)</b> | <b>Tafel slope<br/>(mV dec<sup>-1</sup>)</b> | <b>Durability<br/>(h)</b> | <b>Maximum stabilized<br/>current density (mA cm<sup>-2</sup>)</b> | <b>Ref.</b> |
|--------------------------------------------------|----------------------------------------|----------------------------------------------------|----------------------------------------------|---------------------------|--------------------------------------------------------------------|-------------|
| Ga-CoPt at 50 °C                                 | 249                                    | 341                                                | 145                                          | 169                       | -100                                                               | This work   |
| Ga-CoPt at 60 °C                                 | 208                                    |                                                    | 175                                          |                           |                                                                    |             |
| Ni <sub>2.4</sub> Co <sub>1.6</sub> N/NC         | 256                                    | ~230                                               | 94.1                                         | 2                         | -200                                                               | 1           |
| Ti@Ni(OH) <sub>2</sub> -NiMoS                    | 371                                    | ~370                                               | 162                                          | 12                        | -10                                                                | 2           |
| La <sub>0.17</sub> Mo <sub>0.83</sub> P/PC/MXene | 158                                    | 263                                                | -                                            | 400                       | -100                                                               | 3           |
| P-doped NiSe                                     | 296                                    | -                                                  | 180                                          | 100                       | -100                                                               | 4           |
| Ni/V <sub>2</sub> O <sub>3</sub> -4              | 221                                    | -                                                  | -                                            | -                         | -                                                                  | 5           |
| C-MoCS <sub>x</sub> @MoS <sub>2</sub>            | 312                                    | ~300                                               | 128                                          | -                         | -                                                                  | 6           |
| NiMo@C <sub>3</sub> N <sub>5</sub>               | 486                                    | 264                                                | -                                            | 10                        | -10                                                                | 7           |
| Co-FePO/OH                                       | ~250                                   | ~180                                               | -                                            | 10                        | -10                                                                | 8           |
| NF@Mo-Ni <sub>0.85</sub> Se                      | ~370                                   | ~330                                               | 183.7                                        | 12                        | -10                                                                | 9           |
| N-Co-S/G                                         | ~450                                   | ~280                                               | 341.2                                        | 15                        | -20                                                                | 10          |
| CoNiP/Co <sub>x</sub> P                          | 290                                    | -                                                  | -                                            | 500                       | -10                                                                | 11          |
| Fe-Co <sub>2</sub> P                             | 489                                    | 275                                                | -                                            | 100/48                    | -40/-200                                                           | 12          |

|                                                  |                 |                 |       |     |                           |    |
|--------------------------------------------------|-----------------|-----------------|-------|-----|---------------------------|----|
| NiCoN Ni <sub>x</sub> P NiCoN                    | 165             | 90              | 139.2 | 24  | 10                        | 13 |
| Pt <sub>at</sub> -CoP MNSs                       | ~300            | ~330            | -     | 24  | Potential=-0.5 (V vs RHE) | 14 |
| 2.4% Pt@mh-3D MXene                              | 280             | 308             | -     | 250 | -10                       | 15 |
| VS <sub>2</sub> @V <sub>2</sub> C                | $\eta_{20}=444$ | $\eta_{20}=428$ | 160   | 200 | -150                      | 16 |
| NiRuIr-G                                         | ~200            | -               | -     | -   | -                         | 17 |
| Mn-Ni-S/NF-3                                     | 301             | ~220            | -     | 20  | -15                       | 18 |
| Co <sub>0.31</sub> Mo <sub>1.69</sub> C/MXene/NC | 312             | ~300            | -     | 225 | -40                       | 19 |
| NP-MoS <sub>2</sub> /CC                          | 345.4           | ~290            | -     | 8   | -10                       | 20 |
| NiCoP/NF                                         | 287             | ~290            | -     | -   | -                         | 21 |
| 0.5Rh-GS1000                                     | 320             | 303             | -     | 10  | -10                       | 22 |
| NPnNS                                            | 144             | 121             | 108   | 10  | -100                      | 23 |
| MoS <sub>2</sub> QD-aerogel-100                  | ~350            | ~200            | -     | -   | -                         | 24 |

---

**Table S2.** The mass of the electrodes before and after the HER stability tests.

|               | Mass of electrode (g) |
|---------------|-----------------------|
| Before        | 0.1245                |
| After         | 0.1174                |
| Leakage ratio | 5.7 %                 |

## References

- 1 D. Zhang, Y. Zhou, D. Liu, C. Song and D. Wang, *J. Colloid. Interf. Sci.*, 2023, **629**, 873-881.
- 2 C. Yang, L. Zhou, T. Yan, Y. Bian, Y. Hu, C. Wang, Y. Zhang, Y. Shi, D. Wang, Y. Zhen and F. Fu, *J. Colloid. Interf. Sci.*, 2022, **606**, 1004-1013.
- 3 X. Wu, J. Qiu and Z. Wang, *Small Struct.*, 2022, **4**, 2200268.
- 4 M. Maleki, A. Sabour Rouhaghdam, G. Barati Darband, D. Han, M. Chehelamirani and S. Shanmugam, *J. Electroanal. Chem.*, 2022, **916**, 116379.
- 5 G. Liu, H. Lv, Q. Quan, X. Li, H. Lu, W. Li, X. Cui and L. Jiang, *Chem. Eng. J.*, 2022, **450**, 138079.
- 6 Y. Li, S. Zuo, Q. Li, H. Huang, X. Wu, J. Zhang, H. Zhang and J. Zhang, *Appl. Catal. B: Environ.*, 2022, **318**, 121832.
- 7 X. Bu, X. Liang, Y. Bu, Q. Quan, Y. Meng, Z. Lai, W. Wang, C. Liu, J. Lu, C.-M. Lawrence Wu and J. C. Ho, *Chem. Eng. J.*, 2022, **438**, 135379.
- 8 Q. Zhang, Z. L. Zhe Ru, R. Daiyan, P. Kumar, J. Pan, X. Lu and R. Amal, *ACS Appl. Mater. Inter.*, 2021, **13**, 53798-53809.
- 9 C. Yang, C. Wang, L. Zhou, W. Duan, Y. Song, F. Zhang, Y. Zhen, J. Zhang, W. Bao, Y. Lu, D. Wang and F. Fu, *Chem. Eng. J.*, 2021, **422**, 130125.
- 10 P. Sabhapathy, I. Shown, A. Sabbah, P. Raghunath, J.-L. Chen, W.-F. Chen, M.-C. Lin, K.-H. Chen and L.-C. Chen, *Nano Energy*, 2021, **80**, 105544.
- 11 D. Liu, H. Ai, M. Chen, P. Zhou, B. Li, D. Liu, X. Du, K. H. Lo, K. W. Ng, S. P. Wang, S. Chen, G. Xing, J. Hu and H. Pan, *Small*, 2021, **17**, 2007557.
- 12 Y. Lin, K. Sun, X. Chen, C. Chen, Y. Pan, X. Li and J. Zhang, *J. Energy Chem.*, 2021, **55**, 92-101.
- 13 L. Yu, L. Wu, S. Song, B. McElhenny, F. Zhang, S. Chen and Z. Ren, *ACS Energy Lett.*, 2020, **5**, 2681-2689.
- 14 S. Ye, W. Xiong, P. Liao, L. Zheng, X. Ren, C. He, Q. Zhang and J. Liu, *J. Mater. Chem. A*, 2020, **8**, 11246-11254.
- 15 L. Xiu, W. Pei, S. Zhou, Z. Wang, P. Yang, J. Zhao and J. Qiu, *Adv. Funct. Mater.*, 2020, **30**, 1910028.
- 16 Z. Wang, W. Xu, K. Yu, Y. Feng and Z. Zhu, *Nanoscale*, 2020, **12**, 6176-6187.
- 17 M. Sarno, E. Ponticorvo and D. Scarpa, *Electrochem. Commun.*, 2020, **111**, 106647.
- 18 L. Zeng, Z. Liu, K. Sun, Y. Chen, J. Zhao, Y. Chen, Y. Pan, Y. Lu, Y. Liu and C. Liu, *J. Mater. Chem. A*, 2019, **7**, 25628-25640.
- 19 X. Wu, S. Zhou, Z. Wang, J. Liu, W. Pei, P. Yang, J. Zhao and J. Qiu, *Adv. Energy Mater.*, 2019, **9**, 1901333.
- 20 K. Sun, L. Zeng, S. Liu, L. Zhao, H. Zhu, J. Zhao, Z. Liu, D. Cao, Y. Hou, Y. Liu, Y. Pan and C. Liu, *Nano Energy*, 2019, **58**, 862-869.
- 21 Q. Lv, J. Han, X. Tan, W. Wang, L. Cao and B. Dong, *ACS Appl. Energy Mater.*, 2019, **2**, 3910-3917.
- 22 Y. Liu, X. Hu, B. Huang and Z. Xie, *ACS Sustain. Chem. Eng.*, 2019, **7**, 18835-18843.
- 23 Y. Huang, L. Hu, R. Liu, Y. Hu, T. Xiong, W. Qiu, M. S. Balogun, A. Pan and Y. Tong, *Appl. Catal. B: Environ.*, 2019, **251**, 181-194.
- 24 I. P. Chen, C. H. Hsiao, J. Y. Huang, Y. H. Peng and C. Y. Chang, *ACS Appl. Mater. Inter.*, 2019, **11**, 14159-14165.
